# Supplementary figures and images for: Finite-temperature Wigner phase-space sampling and temperature effects on the excited-state dynamics of 2-nitronaphthalene
Source: Royal Society of Chemistry journal article supplement (doi:10.1039/c8cp03273d), 2018-08-20

Absorption Spectra and Densities of Singlet and Triplet States

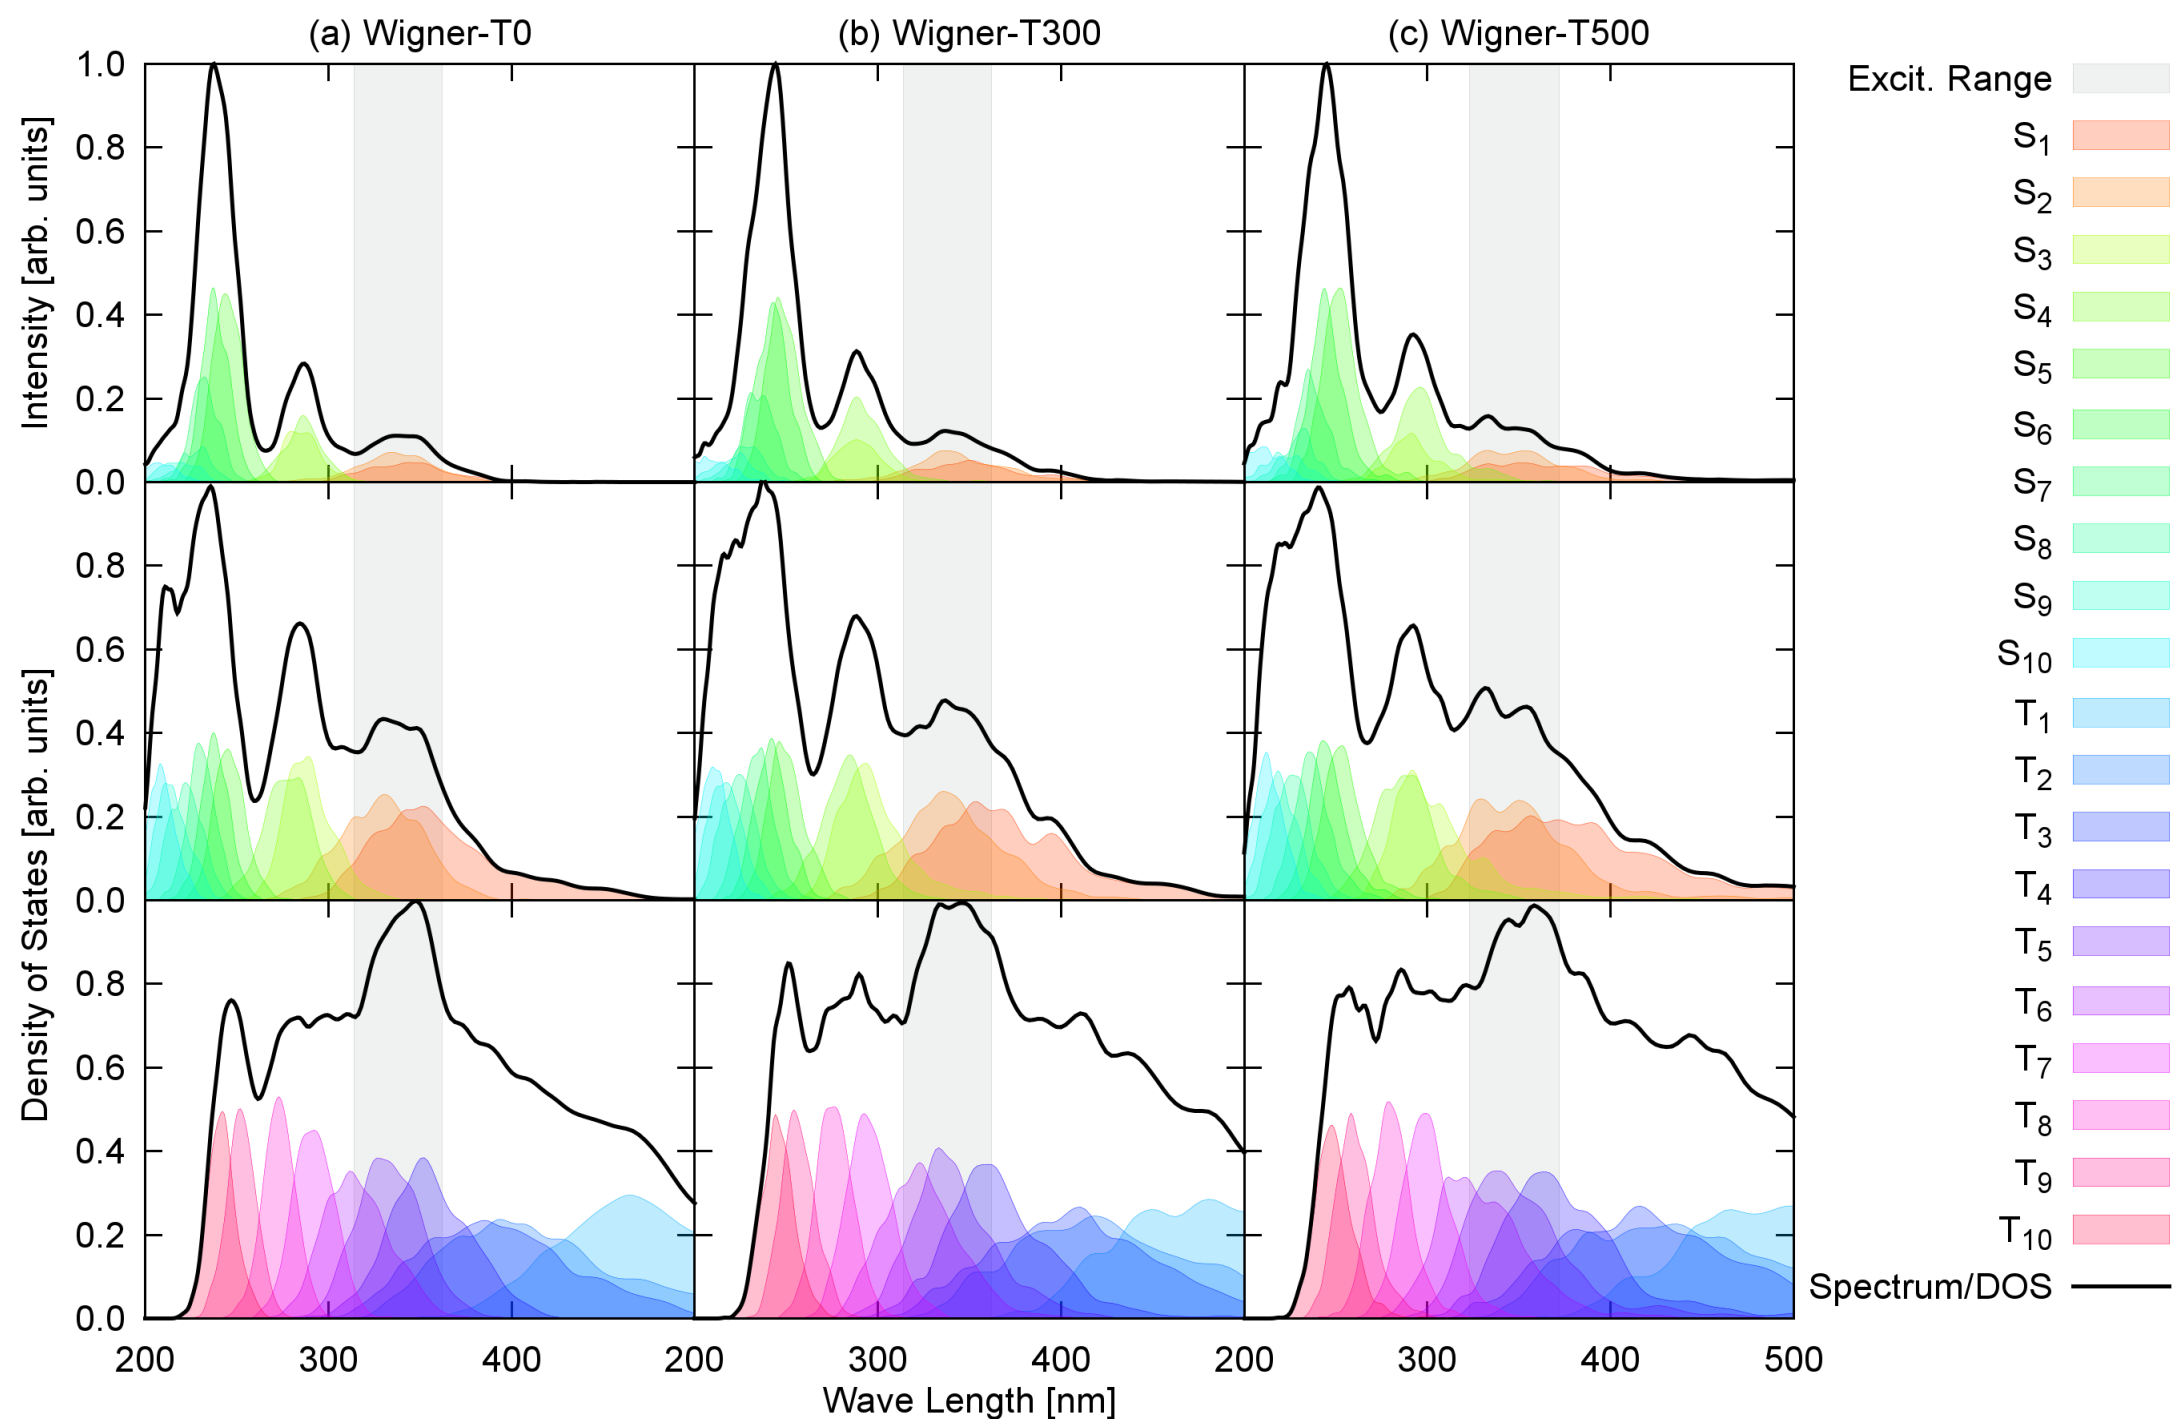

Supplement: c8cp03273d1.pdf [file c8cp03273d1.pdf]
